# Supplementary material for: Myeloid-derived suppressor cells and vaccination against pathogens
Source: Front Cell Infect Microbiol. 2022 Sep 29;12:1003781. doi: 10.3389/fcimb.2022.1003781 (PMC9557202; doi:10.3389/fcimb.2022.1003781)
Supplement: Supplementary file 1 [file DataSheet_1.pdf]

Table I. Immunization against pathogens and MDSC related observations

| Type of Pathogen | Immunization                                                    | Animal model | Vaccine Administration Route | Observation                                                                                                                | Reference                                            |
|------------------|-----------------------------------------------------------------|--------------|------------------------------|----------------------------------------------------------------------------------------------------------------------------|------------------------------------------------------|
| Bacteria         | BCG                                                             | Mice         | Intravenous                  | Natural suppressor cells were activated and increased in the spleen after BCG administration                               | (Bennett et al., 1978)                               |
|                  | BCG                                                             | Mice         | Intradermal                  | NO-producing MDSCs with ability to impair T cell priming were recruited to the site of inoculation                         | (Martino et al., 2010)                               |
|                  | <i>M. Tuberculosis</i> in CFA                                   | Mice         | Subcutaneous                 | Gr-1+ splenocytes from primed mice showed suppressive capacity in vitro                                                    | (Dietlin et al., 2007)                               |
|                  | <i>M. Tuberculosis</i> in CFA.                                  | Mice         | Subcutaneous                 | CD11b+ Gr-1+ cells with NO-dependent suppressive capacity increased in the spleen                                          | (Ribechini et al., 2019)                             |
|                  | <i>Mycobacterium tuberculosis</i> in CFA plus LPS/IFN- $\gamma$ | Mice         | Subcutaneous                 | M-MDSCs with ability to kill dendritic cells (DCs) were found in the spleen                                                | (Ribechini et al., 2019)                             |
|                  | Attenuated <i>Salmonella typhimurium</i>                        | Mice         | Intraperitoneal              | Immunization induced NO-producing macrophage precursors with suppressive capacity                                          | (al-Ramadi et al., 1991)<br>(al-Ramadi et al., 1992) |
|                  | <i>Salmonella</i> bivalent vaccine                              | Mice         | Orally by gastrointubation   | Lower levels of MDSCs in immunized and orally infected mice correlated with increased humoral and cellular immune response | (Heithoff et al., 2008)                              |

|         |                                                                      |                 |                                |                                                                                                                                                          |                                               |
|---------|----------------------------------------------------------------------|-----------------|--------------------------------|----------------------------------------------------------------------------------------------------------------------------------------------------------|-----------------------------------------------|
| Viruses | Mix of several adjuvants                                             | Rhesus macaques | Intracolorectal                | Lower levels of MDSC resembling cells in adjuvant treated animals correlated with lower viral load after a SIV challenge.                                | (Sui et al., 2014)                            |
|         | PD1-based vaccine                                                    | Mice            | Intramuscular                  | EcoHIV i.p. infection expanded MDSCs. Depletion of MDSCs allowed a better clearance of infected cells                                                    | (Liu et al., 2020)                            |
|         | DNA-SIV+ALVAC-SIV + gp120 alum                                       | Rhesus macaques | Intramuscular                  | Immunized macaques increased the levels of M-MDSC-like cells and had increased risk of SIV infection.                                                    | (Vaccari et al., 2019)                        |
|         | HIV/SIV peptides, + MVA-SIV antigens, + HIVgp120-CD4 fusion protein. | Rhesus macaques | Intrarectal                    | After intrarectal SIV challenge, vaccinated animals had significant increases of CD14+ M-MDSCs and CD15+ PMN-MDSCs in the PBMCs.                         | (Sui et al., 2019)                            |
|         | mRNA encoding the hemagglutinin of H10N8 influenza A virus.          | Rhesus macaques | Intramuscular                  | Immunization induced M-MDSCs and PMN-MDSCs with ability to suppress T cell proliferation in vitro.                                                       | (Lin et al., 2018)                            |
| Fungi   | Low-virulence <i>Candida</i> strains.                                | Mice            | Intraperitoneal or intravenous | Immunized mice increased MDSCs in the peritoneal cavity after a challenge with Ca/Sa. Depletion of Ly6G+ cells increased mortality of vaccinated animals | (Lilly et al., 2018).<br>(Lilly et al., 2021) |

|           |                                                                                        |      |                 |                                                                                                                                                                                                                    |                                                   |
|-----------|----------------------------------------------------------------------------------------|------|-----------------|--------------------------------------------------------------------------------------------------------------------------------------------------------------------------------------------------------------------|---------------------------------------------------|
| Parasites | <i>SLA from L. donovani.</i>                                                           | Mice | Intraperitoneal | Immunization increased spleen and liver MDSCs that were less suppressive than MDSCs induced by <i>L. donovani</i> infection                                                                                        | (Bandyopadhyay et al., 2015)                      |
|           | Peptide linked to PSNP, or peptide formulated with Montanide or Poli I:C as adjuvants. | Mice | Intradermical   | Immunization using PSNP or Montanide did not cause MDSC increases and generated a CD8 response against <i>P. berghei</i> . In contrast, Poli I:C increased MDSCs, correlating with lack of CD8 protective response | (Wilson et al., 2015)                             |
|           | TSf from <i>T. cruzi</i> formulated with ISPA.                                         | Mice | Subcutaneous    | TSf-ISPA immunized mice had better survival against <i>T. cruzi</i> , correlating with a significant decrease of spleen MDSCs as compared to non-immunized and infected mice                                       | (Prochetto et al., 2017).<br>(Gamba et al., 2021) |

Table legend: *M. tuberculosis*: *Mycobacterium tuberculosis*. CFA: Complete Freund Adjuvant; *S. Typhimurium*: *Salmonella Typhimurium*; i.p.: intraperitoneal; MVA: Modified vaccinia Ankara; SLA: Soluble *Leishmania* antigen; *L. donovani*: *Leishmania Donovanii*; PSNP: polystyrene nanoparticles; *P. berghei*: *Plasmodium berghei*; TSf: Trans-sialidase fragment; *T. cruzi*: *Trypanosoma cruzi*; ISPA: immunostimulating cage like particles; Ca/Sa: *Candida albicans/Staphylococcus aureus*.
